# Supplementary material for: Validation of the Aura High Resolution Dynamics Limb Sounder geopotential heights
Source: Copernicus journal article supplement (doi:10.5194/amt-7-2775-2014), 2014-08-29
Supplement: Supplementary file 2 [file amt-7-2775-2014-supplement.zip]

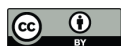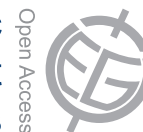

*Supplement of*

## **Validation of the Aura High Resolution Dynamics Limb Sounder geopotential heights**

**L. L. Smith and J. C. Gille**

*Correspondence to:* L. L. Smith (lsmith@ucar.edu)

- Supplement-Cover-Letter.pdf
- SmithGille\_GPHpaper\_SupFigures
  - SmithGille\_SuppFigure1.pdf
  - SmithGille\_SuppFigure2.pdf
  - SmithGille\_SuppFigure3.pdf
  - supplemental\_figure\_captions.txt
