# Supplementary figures and images for: Validation of the Aura High Resolution Dynamics Limb Sounder geopotential heights
Source: Copernicus journal article supplement (doi:10.5194/amt-7-2775-2014), 2014-08-29

(a) HIRDLSv7 2006d138 U (m/s)

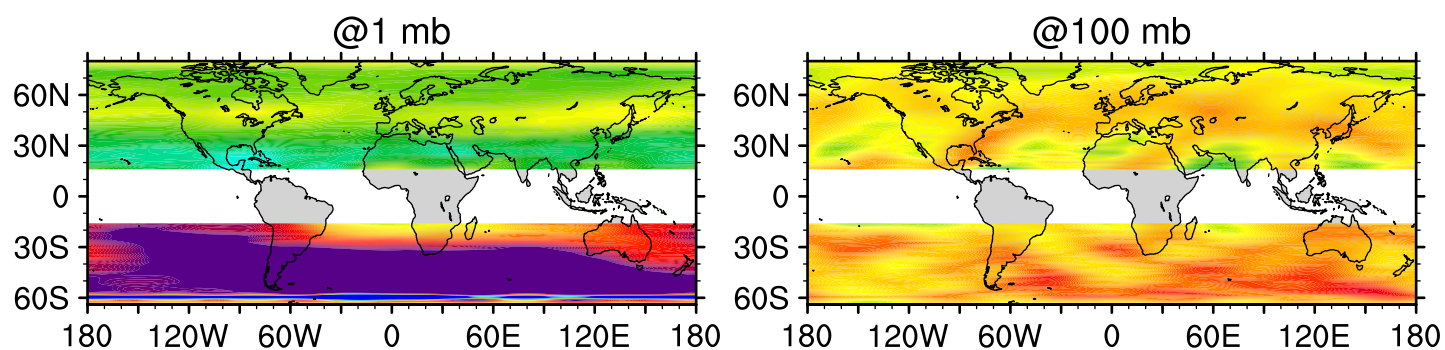

(b) WACCM 2006d138 U (m/s)

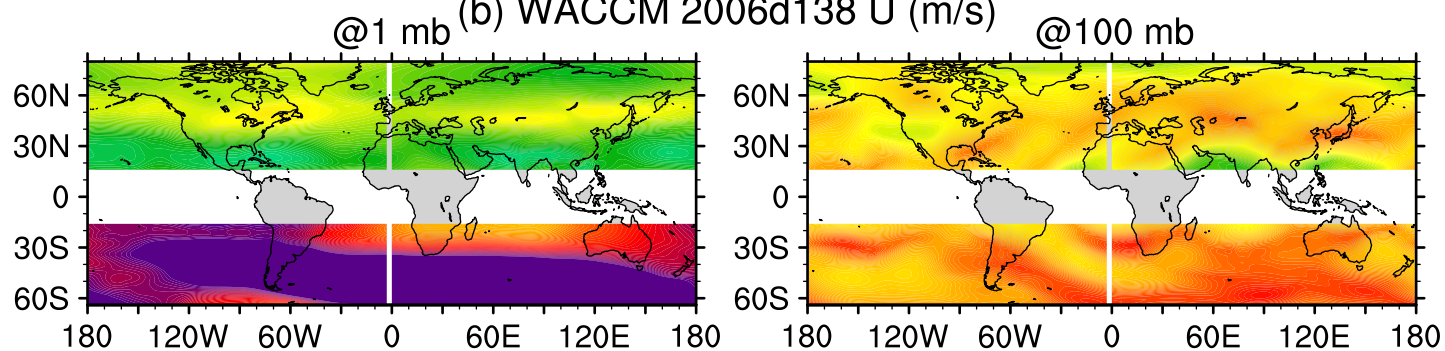

(c) HIRDLSv7-WACCM 2006d138 U (m/s)

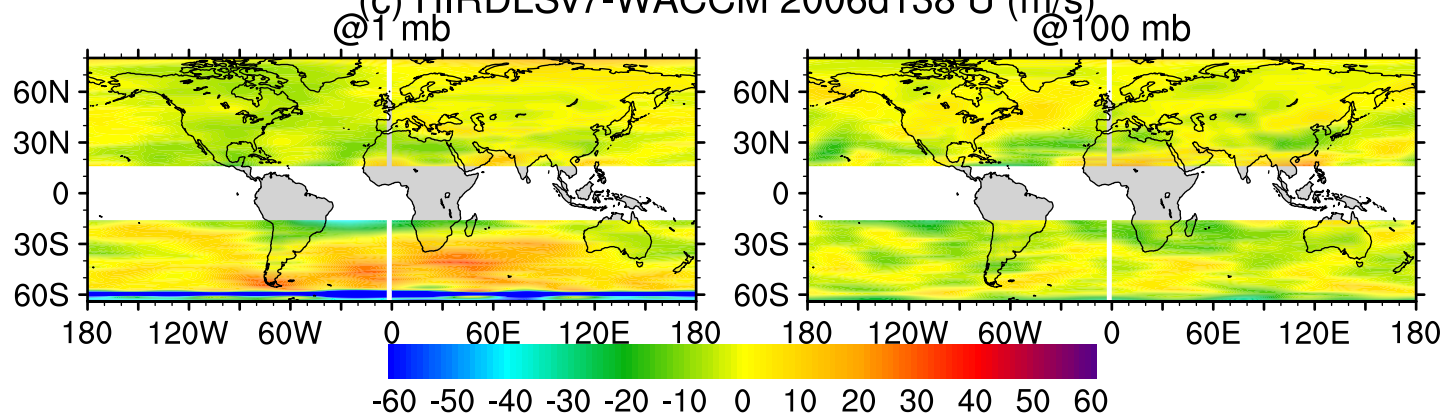

Supplement: Supplementary file 1 [file amt-7-2775-2014-supplement.zip]

# GPH HIRDLS v7 -- WACCM (m)

(a) Mean

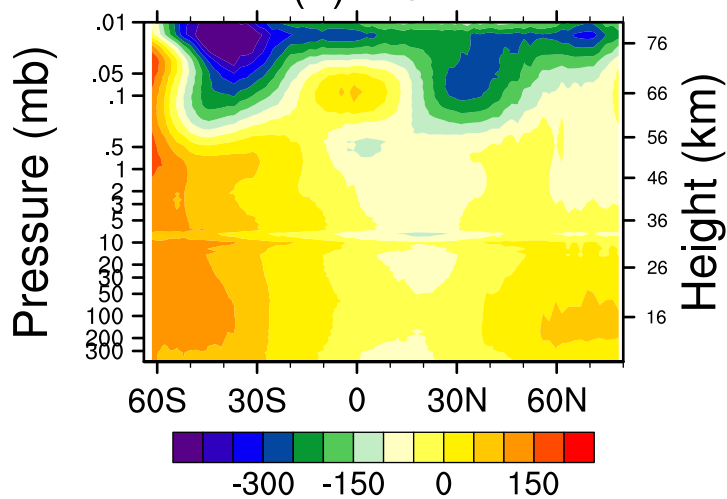

(b) Standard Deviation

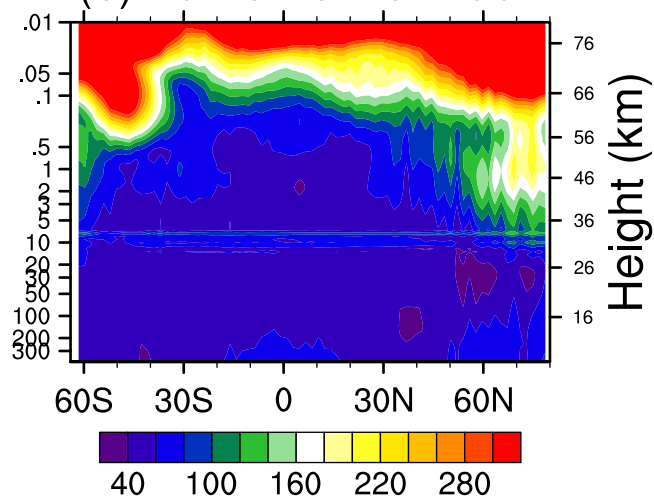

Supplement: Supplementary file 3 [file amt-7-2775-2014-supplement.zip]

(a) HIRDLSv7 2006d138 V (m/s)

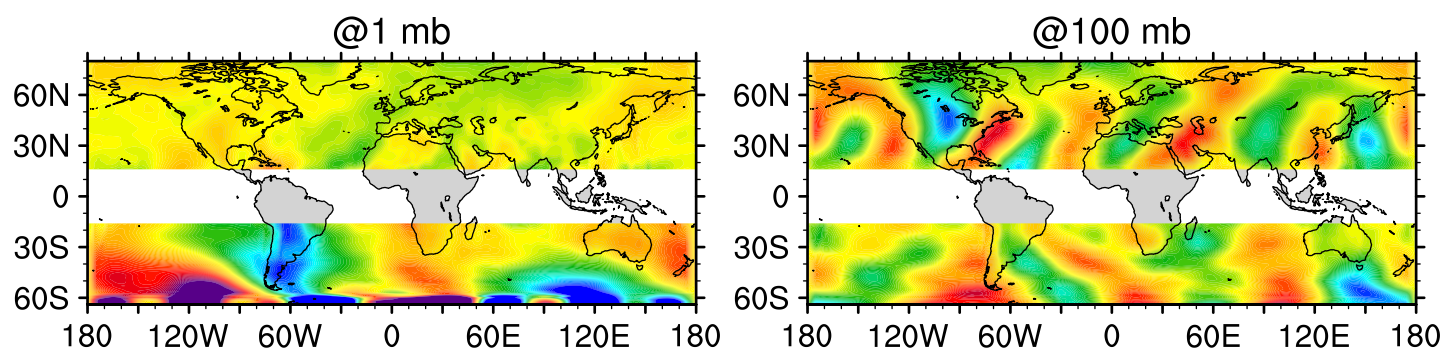

(b) WACCM 2006d138 V (m/s)

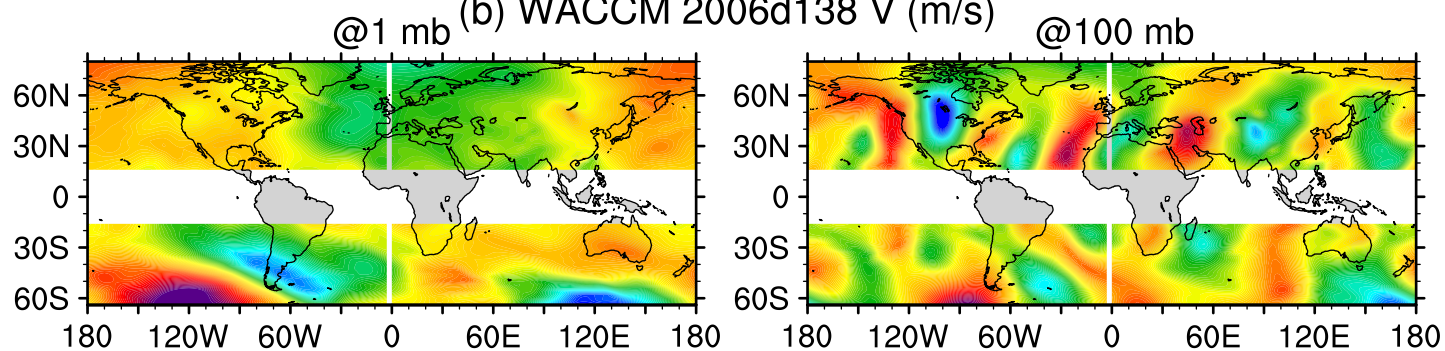

(c) HIRDLSv7-WACCM 2006d138 V (m/s)

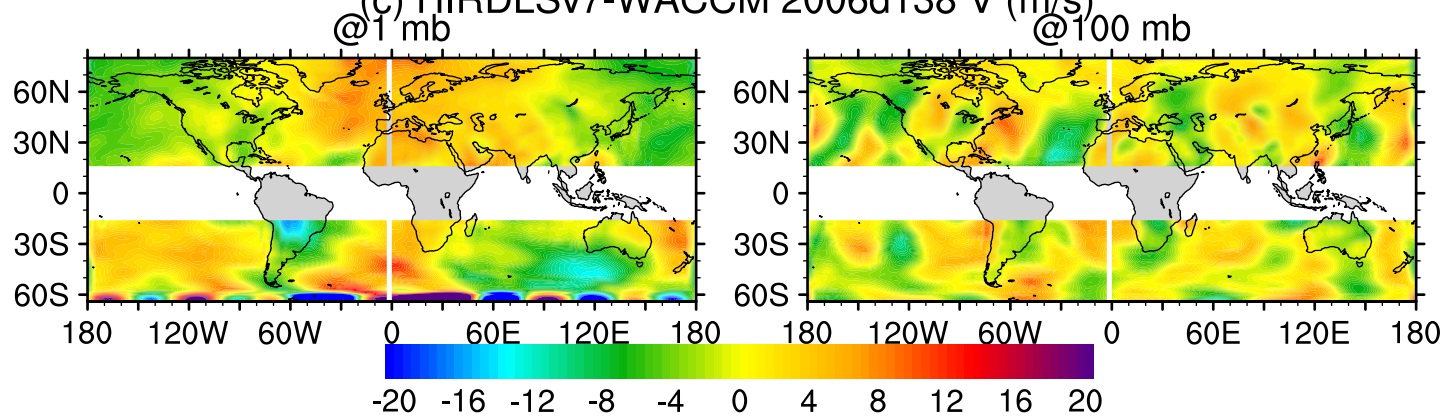

Supplement: Supplementary file 4 [file amt-7-2775-2014-supplement.zip]
